# Supplementary material for: Unraveling the thermal stability of aromatic disulfide epoxy vitrimers: a comprehensive study using principal component analysis (PCA)
Source: Royal Society of Chemistry journal article supplement (doi:10.1039/d4lp00156g), 2024-01-01
Supplement: d4lp00156g1.pdf [file d4lp00156g1.pdf]

## Supporting Information

### Unraveling the Thermal Stability of Aromatic Disulfide Epoxy Vitrimers: A Comprehensive Study using Principal Component Analysis (PCA)

*Paula Fanlo, Alaitz Ruiz de Luzuriaga\*, Gorka Albizu, Marta Ximenis, Alaitz Rekondo, Hans Jürgen Grande and Haritz Sardon\**

<sup>1</sup> CIDETEC, Basque Research and Technology Alliance (BRTA), Po. Miramón 196, 20014 Donostia-San Sebastian, Spain

<sup>2</sup> POLYMAT, Department of Polymers and Advanced Materials: Physics, Chemistry and Technology, Faculty of Chemistry University of the Basque Country UPV/EHU, Joxe Mari Korta Center, Avda. Tolosa 72, 20018 Donostia-San Sebastian, Spain.

<sup>3</sup> Department of Applied Chemistry, Faculty of Chemistry, University of Basque Country (UPV/EHU), 20018 San Sebastian, Spain

\* Correspondence: [aruiz@cidetec.es](mailto:aruiz@cidetec.es); [haritz.sardon@ehu.es](mailto:haritz.sardon@ehu.es)

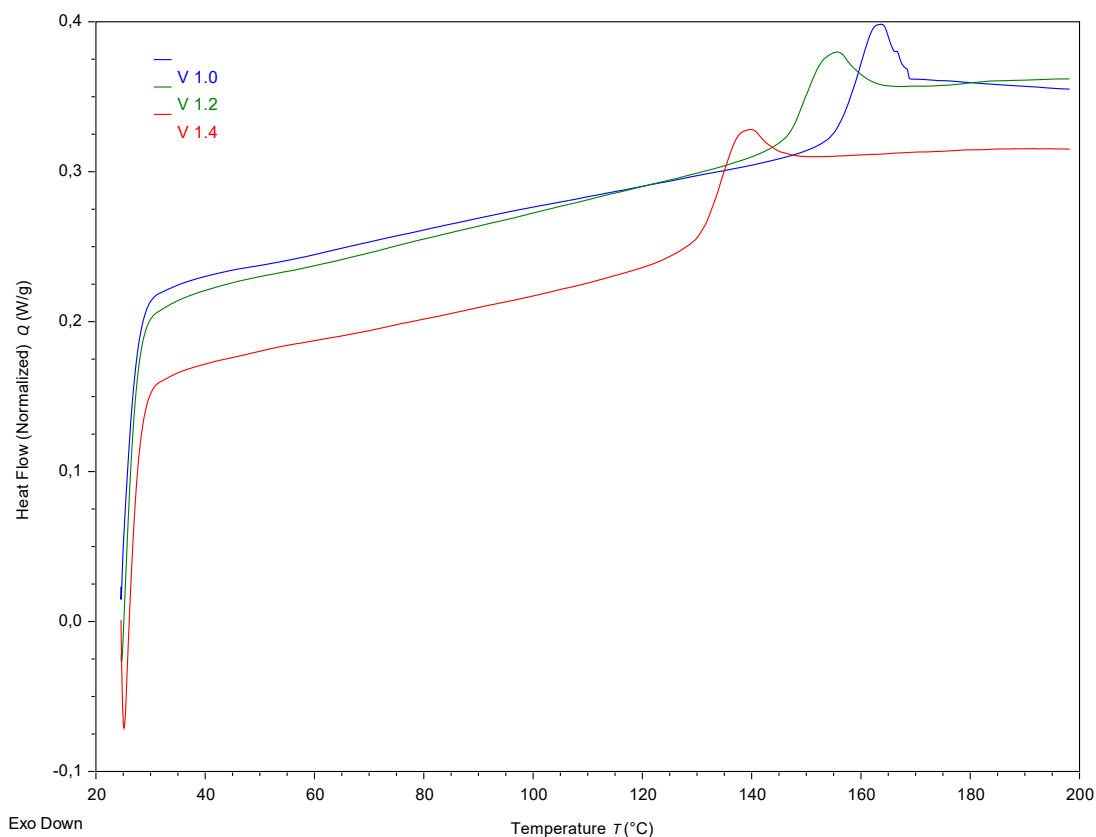

**Figure S1.** The complete cure of the epoxy vitrimers (V 1.0, V1.2 and V 1.4) by differential scanning calorimetry (DSC).

**Table S1.** MCR data at different times, temperatures and stoichiometries of the MC

| <i>Conditions</i> | % MCR      |            |            |            |            |
|-------------------|------------|------------|------------|------------|------------|
|                   | <b>1.0</b> | <b>1.1</b> | <b>1.2</b> | <b>1.3</b> | <b>1.4</b> |
| <i>200 10 min</i> | 14,05      | 16,42      | 2,5        | 18,12      | 20,98      |
| <i>200 30 min</i> | 22,5       | 45,22      | 46,87      | 38,45      | 21,01      |
| <i>200 1 h</i>    | 66,7       | 67,03      | 43,46      | 67,95      | 78,1       |
| <i>205 10 min</i> | 14,2       | 8,83       | 2          | 12,56      | 11,39      |
| <i>205 30 min</i> | 37,88      | 39,86      | 32,85      | 45,2       | 47,54      |
| <i>205 1 h</i>    | 60,79      | 58,89      | 69,88      | 60,08      | 64,68      |
| <i>210 10 min</i> | 27,02      | 38,54      | 35,39      | 39,81      | 50,52      |
| <i>210 30 min</i> | 39,79      | 32,3       | 38,42      | 38,5       | 40,34      |
| <i>210 1 h</i>    | 66,73      | 86,47      | 76,56      | 79,71      | 84,74      |
| <i>215 10 min</i> | 54,56      | 47,84      | 45,05      | 32,7       | 39,71      |
| <i>215 30 min</i> | 51,32      | 53,27      | 62,13      | 48,34      | 46,84      |
| <i>215 1 h</i>    | 93,74      | 88,5       | 92,65      | 78,19      | 90,96      |
| <i>220 10 min</i> | 29,58      | 28,08      | 21,07      | 25,88      | 31,07      |
| <i>220 30 min</i> | 55,9       | 61,84      | 52,63      | 70,28      | 63,95      |
| <i>220 1 h</i>    | 99,73      | 95,5       | 96,45      | 100        | 99,56      |

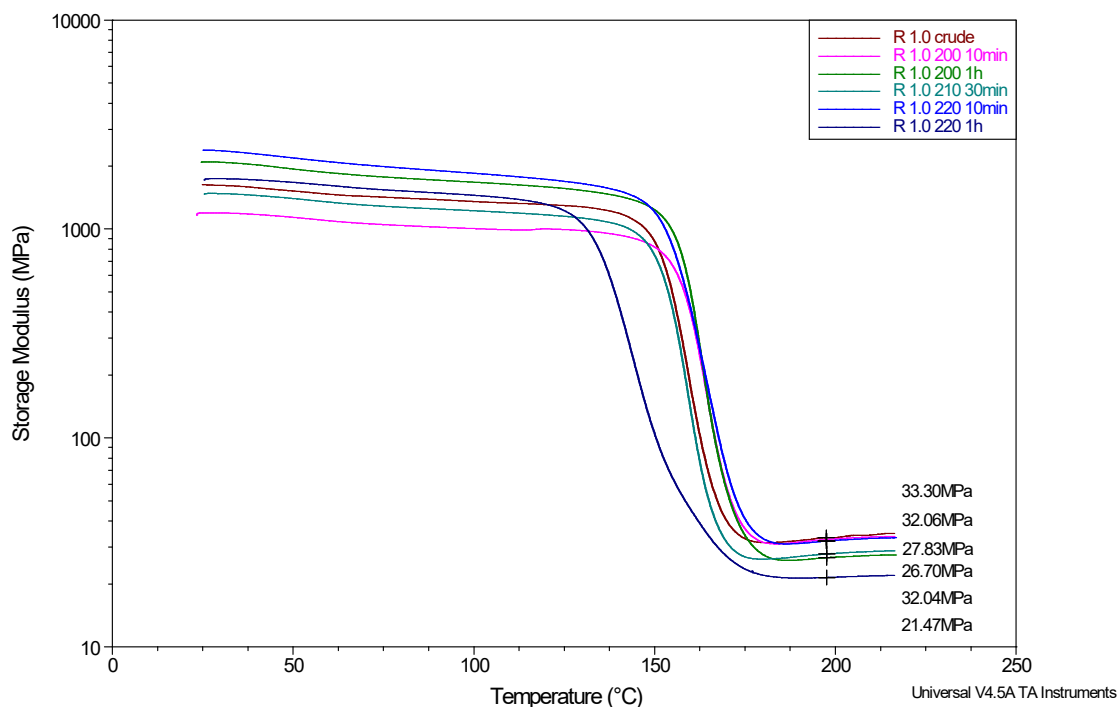

**Figure S2.** Storage modulus vs temperature in V 1.0 samples

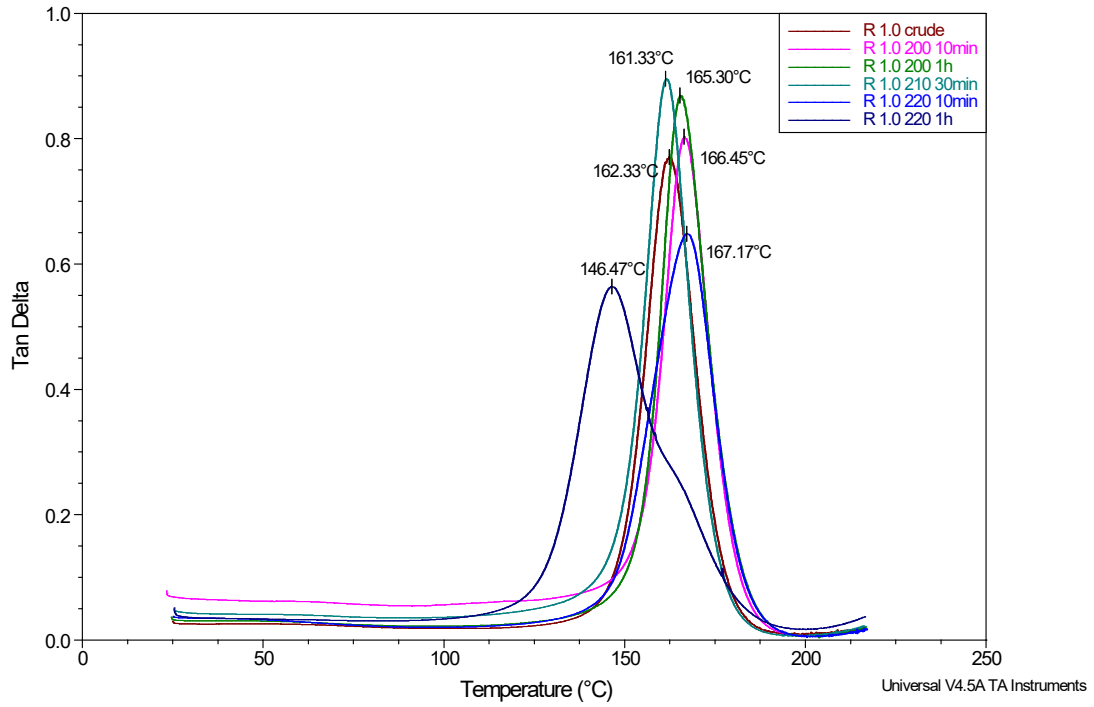

**Figure S3.** Tan Delta vs temperature in V 1.0 samples.

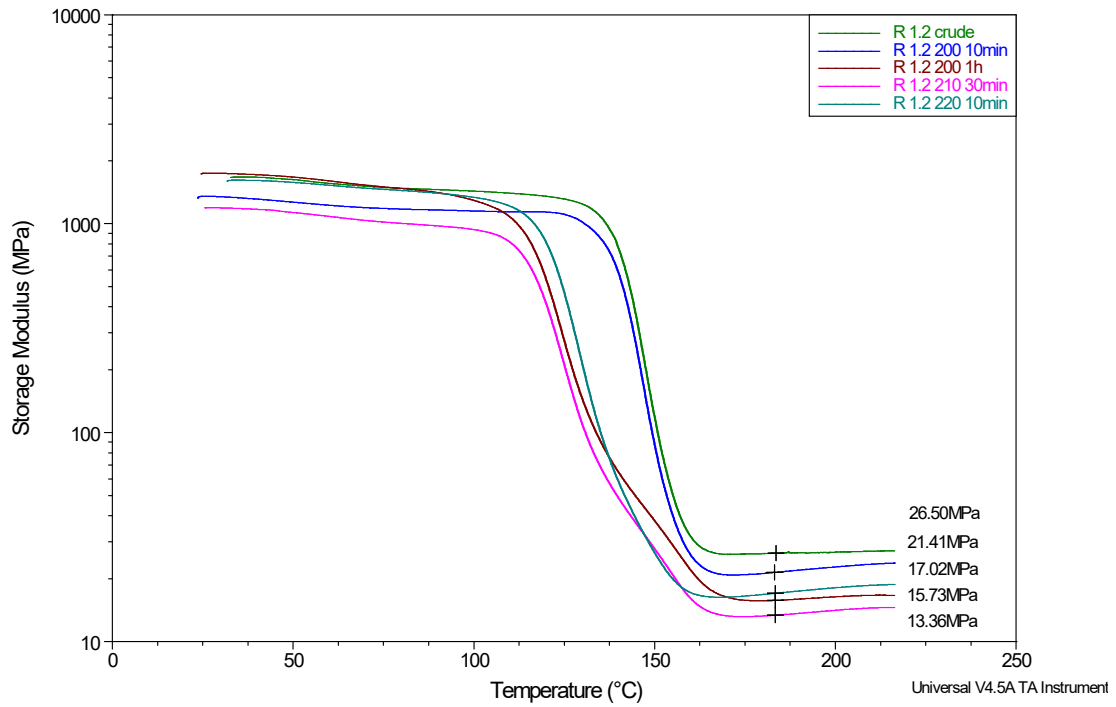

**Figure S4.** Storage modulus vs temperature in V 1.2 samples.

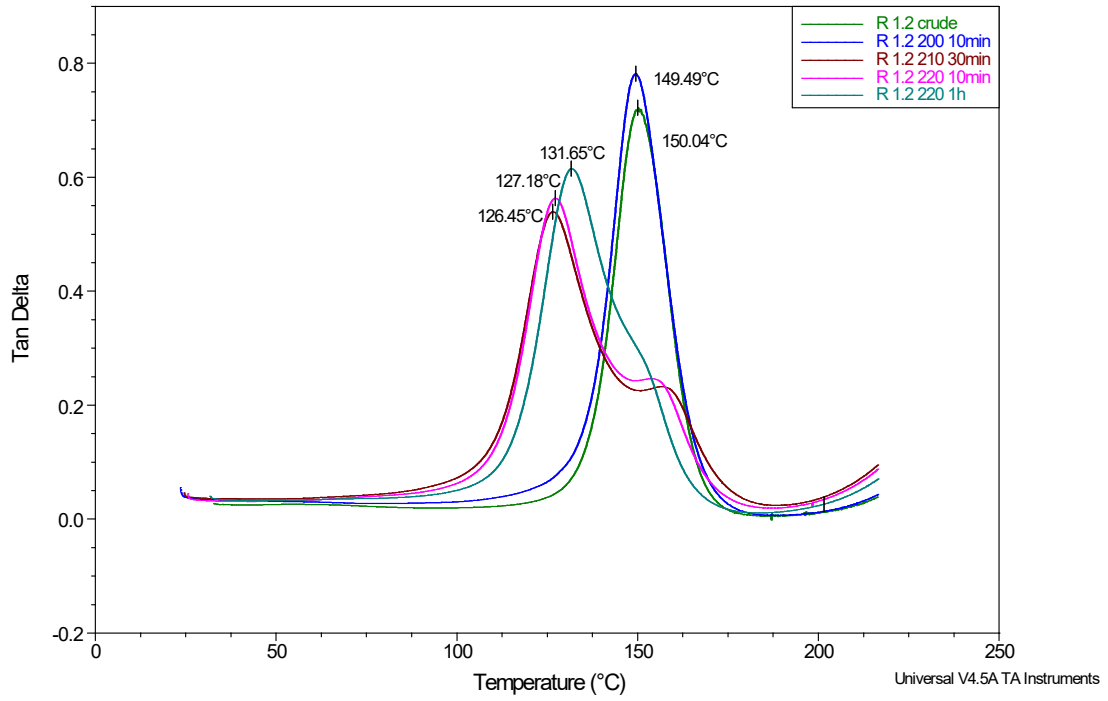

**Figure S5.** Tan Delta vs temperature in V 1.2 samples.

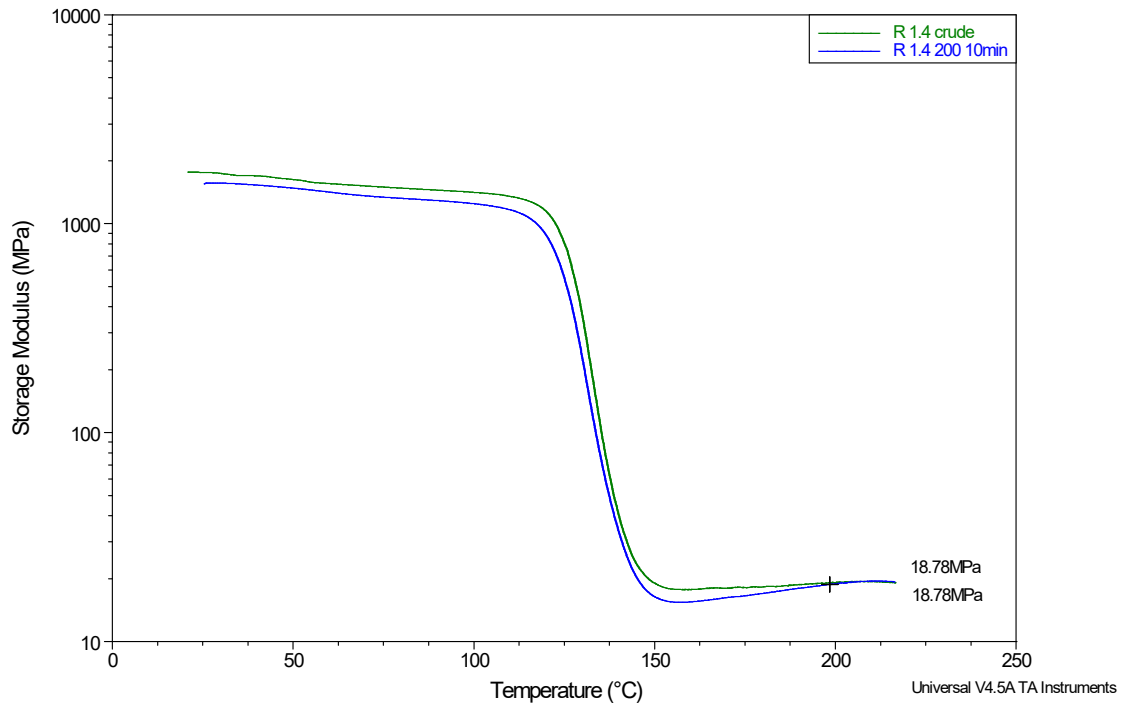

**Figure S6.** Storage modulus vs temperature in V 1.4 samples.

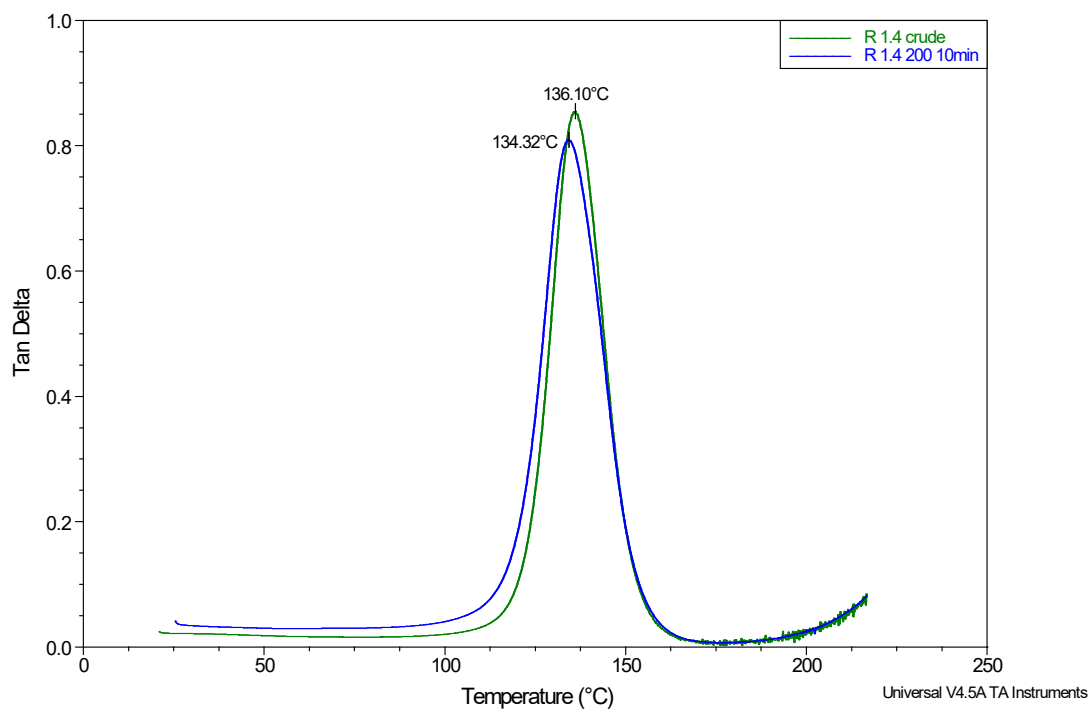

**Figure S7.** Tan Delta vs temperature in V 1.4 samples.

**Table S2.**  $\Delta T_g$  and  $\Delta G'$  after thermal treatment of the vitrimer samples depending on a) time, b) temperature and c) stoichiometry.

a)

| Network         | 10 minutes        |                   |             | 60 minutes        |                   |             |
|-----------------|-------------------|-------------------|-------------|-------------------|-------------------|-------------|
|                 | $\Delta T_g$ (°C) | $\Delta G'$ (MPa) | Degradation | $\Delta T_g$ (°C) | $\Delta G'$ (MPa) | Degradation |
| V 1.0<br>220 °C | 1                 | 2                 | NO          | 16                | 12                | YES         |
| V 1.2<br>200 °C | 0                 | 4                 | NO          | 23                | 10                | YES         |
| V 1.4<br>200 °C | 2                 | 1                 | NO          | degraded          | degraded          | YES         |

b)

| Network      | 200 °C            |                   |             | 220 °C            |                   |             |
|--------------|-------------------|-------------------|-------------|-------------------|-------------------|-------------|
|              | $\Delta T_g$ (°C) | $\Delta G'$ (MPa) | Degradation | $\Delta T_g$ (°C) | $\Delta G'$ (MPa) | Degradation |
| V 1.0<br>60m | 0                 | 5                 | NO          | 16                | 12                | YES         |
| V 1.2<br>10m | 0.5               | 3.5               | NO          | 18.3              | 8.2               | YES         |
| V 1.4<br>10m | 1.7               | 0.7               | NO          | degraded          | degraded          | YES         |

c)

| Network         | 1.0               |                   |             | 1.2               |                   |             | 1.4               |                   |             |
|-----------------|-------------------|-------------------|-------------|-------------------|-------------------|-------------|-------------------|-------------------|-------------|
|                 | $\Delta T_g$ (°C) | $\Delta G'$ (MPa) | Degradation | $\Delta T_g$ (°C) | $\Delta G'$ (MPa) | Degradation | $\Delta T_g$ (°C) | $\Delta G'$ (MPa) | Degradation |
| V 200°C<br>-10m | 0                 | 1                 | NO          | 0                 | 4                 | NO          | 2                 | 1                 | NO          |
| V 210°C<br>-30m | 1                 | 5                 | NO          | 23                | 12                | YES         | degraded          | degraded          | YES         |
| V 220°C<br>-60m | 16                | 12                | YES         | 25                | 25                | YES         | degraded          | degraded          | YES         |
